# Supplementary material for: In-depth immune cellular profiling reveals sex-specific associations with frailty
Source: PubMed Central journal article supplement (PMC7310472; doi:10.1186/s12979-020-00191-z), 2020-06-23
Supplement: 12979_2020_191_MOESM1_ESM.pdf [file 12979_2020_191_MOESM1_ESM.pdf]

# In-depth immune cellular profiling reveals sex-specific associations with frailty

Supplementary figures and tables

Leonard Daniël Samson, A. Mieke H. Boots, José A. Ferreira, H. Susan J. Picavet, Lia de Rond, Mary-lène de Zeeuw, W. M. Monique Verschuren, Anne-Marie Buisman, Peter Engelfriet

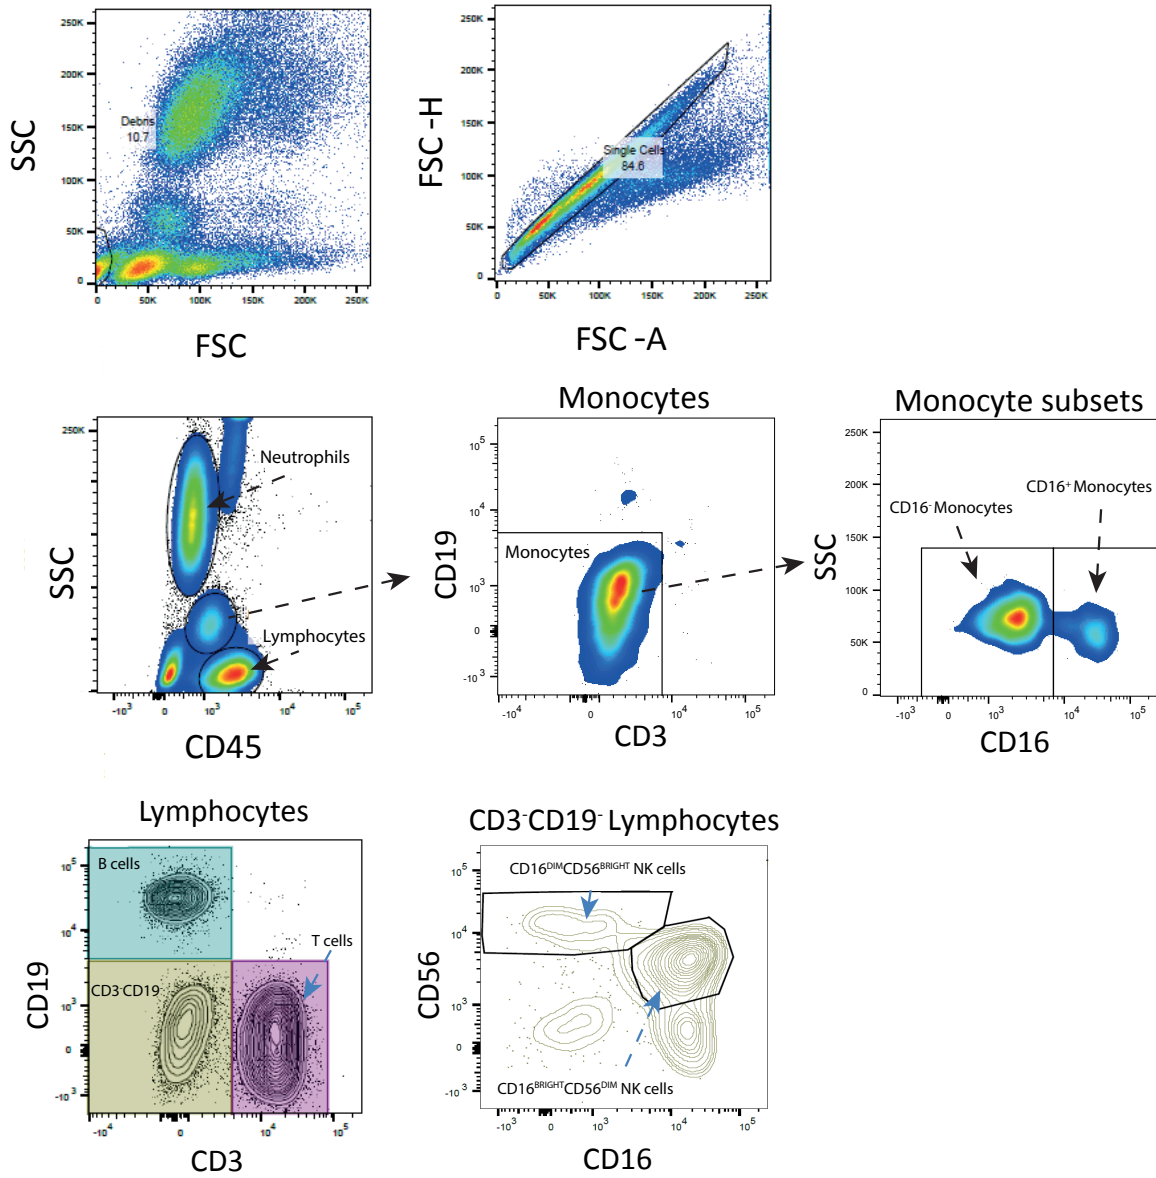

Figure S1: General gating strategy showing gating of single cells by FSC-A versus FSC-H, leukocyte subsets by SSC and CD45, monocyte subpopulations by CD16, T and B-cells by CD3 and CD19, and NK cells by CD16 and CD56.

a.

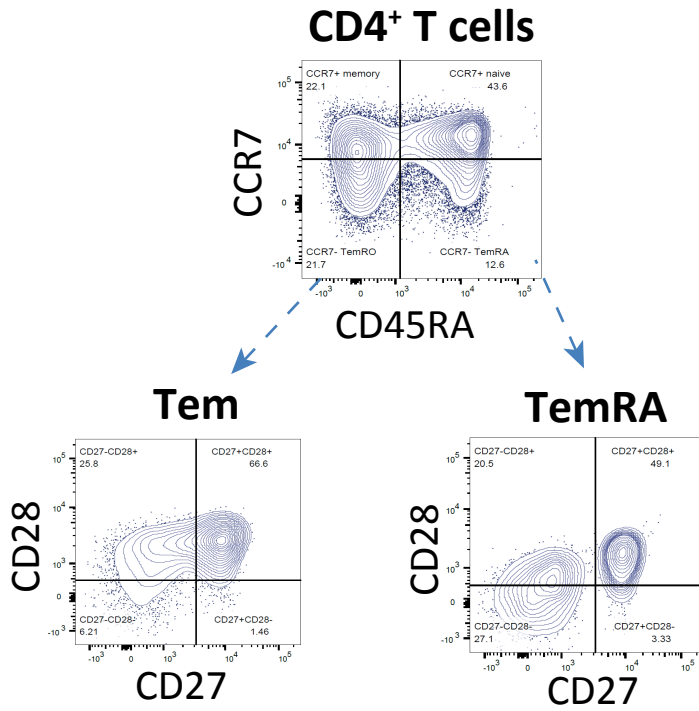

b.

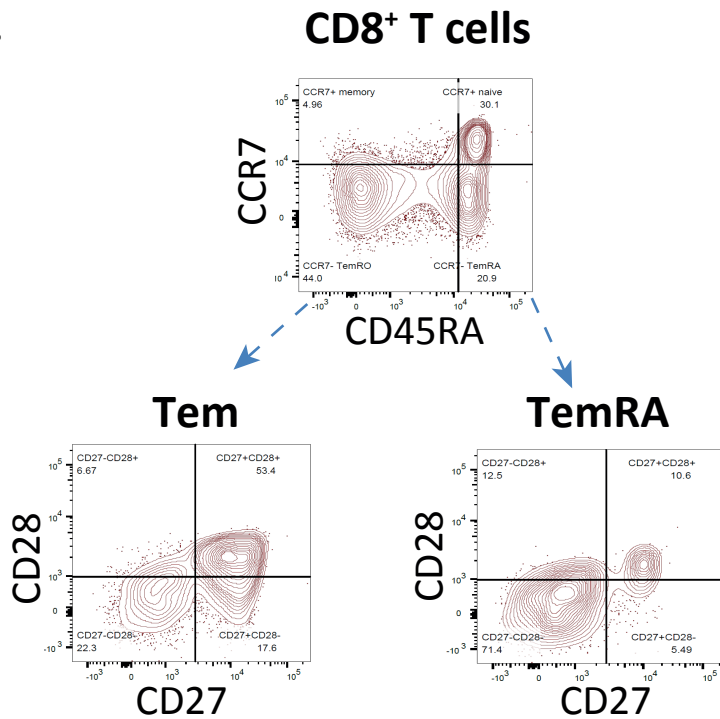

Figure S2: Gating strategy for (a) memory CD4 T cells and (b) memory CD8 T cells. Tem: effector memory (CD4 or CD8 positive) T cells. TemRA: Terminally differentiated (CD4 or CD8 positive) T cells re-expressing CD45RA.

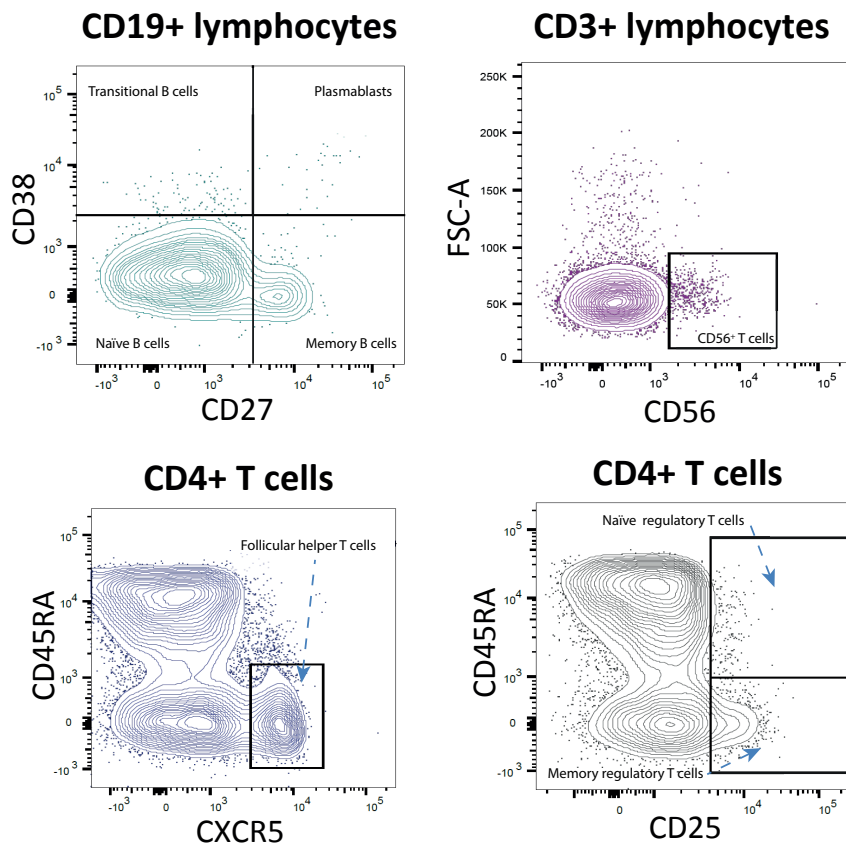

Figure S3: Gating strategy for (a) B cell subsets and (b) follicular helper T cells and regulatory T cells.

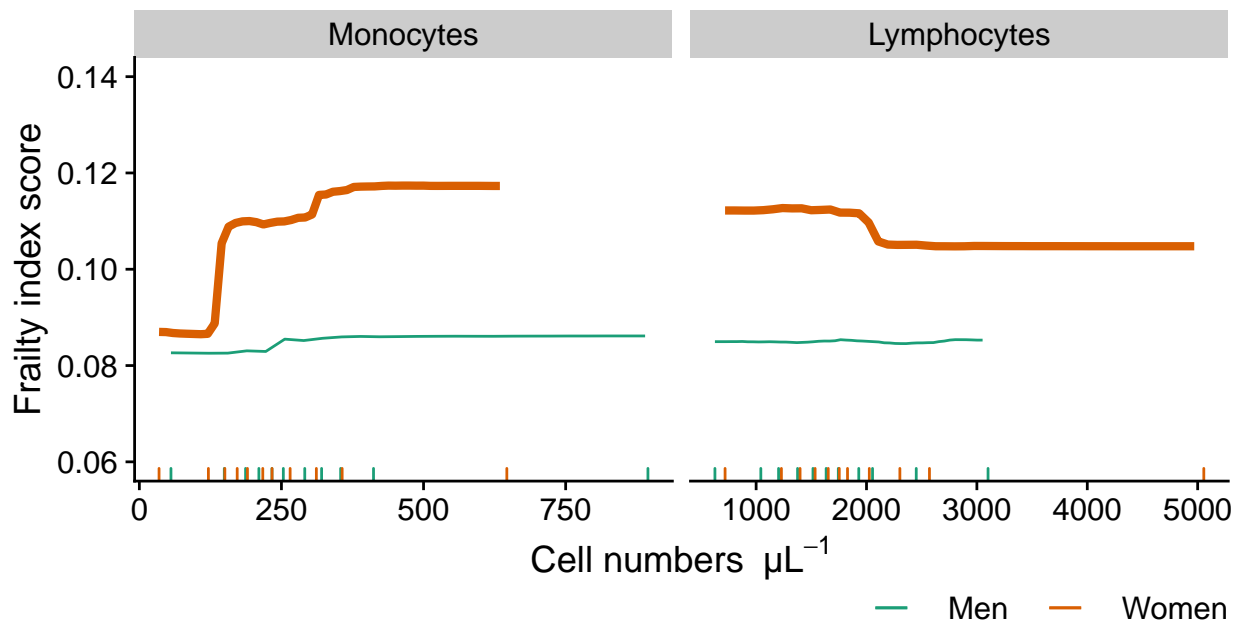

Figure S4: Partial dependence plots showing how frailty ‘depends’ on total monocyte numbers and total lymphocyte numbers in men (n=140) and women (n=137). Participants with missing frailty index score data (n=12) were excluded from analysis. The short vertical segments on the horizontal axis represent the deciles of the cell numbers in the data. Range of the figures is restricted to the part containing most of the data.

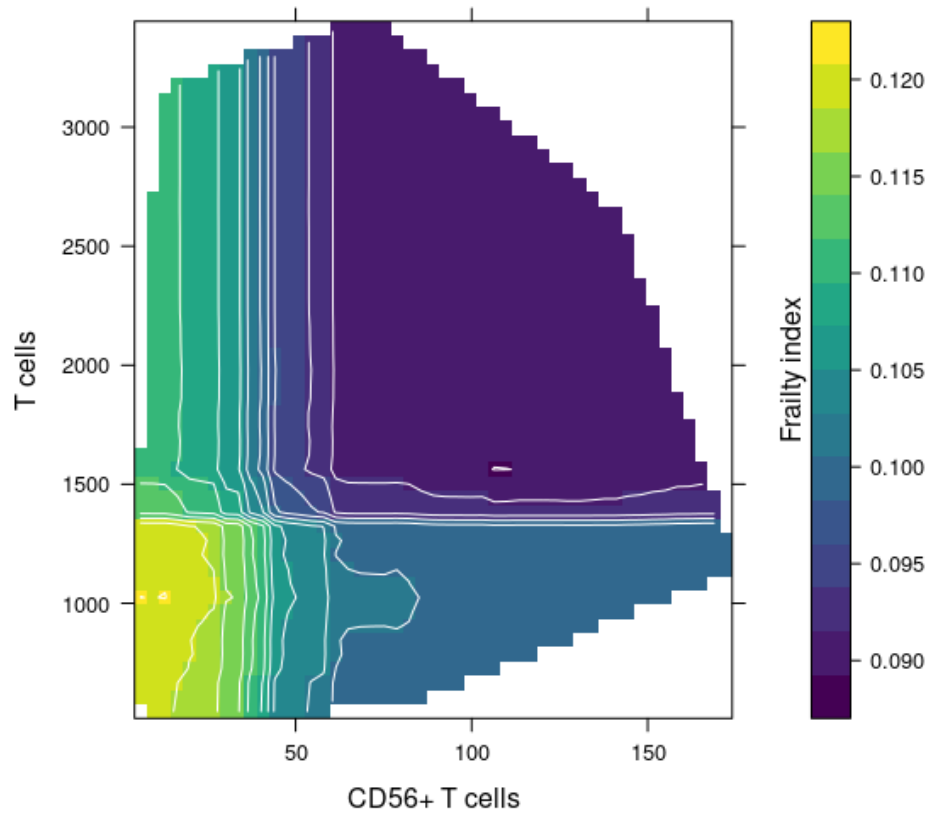

Figure S5: Partial dependence plot with the possible joint relationship of total T cell numbers and CD56<sup>+</sup> T cell numbers on frailty. To avoid extrapolation, the plot is restricted to the area of which data is available.

Table S1: Definition of cell phenotypes by expression of cell surface markers

| Cell phenotype                     | Definition                                                                                                  |
|------------------------------------|-------------------------------------------------------------------------------------------------------------|
| <b>T cells</b>                     |                                                                                                             |
| T cells                            | CD45 <sup>+</sup> CD3 <sup>+</sup>                                                                          |
| T Follicular helper                | CD3 <sup>+</sup> CD4 <sup>+</sup> CD45RA <sup>-</sup> CXCR5 <sup>+</sup>                                    |
| CD56 <sup>+</sup> T cells          | CD45 <sup>+</sup> CD3 <sup>+</sup> CD56 <sup>+</sup>                                                        |
| CD4/CD8 ratio                      | CD4 T cells/CD8 T cells                                                                                     |
| CD4 T cells                        | CD45 <sup>+</sup> CD3 <sup>+</sup> CD4 <sup>+</sup>                                                         |
| CD4 Naive                          | CD3 <sup>+</sup> CD4 <sup>+</sup> CD45RA <sup>+</sup> CCR7 <sup>+</sup>                                     |
| CD4 CM                             | CD3 <sup>+</sup> CD4 <sup>+</sup> CD45RA <sup>-</sup> CCR7 <sup>+</sup>                                     |
| CD4 TemRA                          | CD3 <sup>+</sup> CD4 <sup>+</sup> CD45RA <sup>+</sup> CCR7 <sup>-</sup>                                     |
| CD4 TemRA Early                    | CD3 <sup>+</sup> CD4 <sup>+</sup> CD45RA <sup>+</sup> CCR7 <sup>-</sup> CD27 <sup>+</sup> CD28 <sup>+</sup> |
| CD4 TemRA Late                     | CD3 <sup>+</sup> CD4 <sup>+</sup> CD45RA <sup>+</sup> CCR7 <sup>-</sup> CD27 <sup>-</sup> CD28 <sup>-</sup> |
| CD4 Tem                            | CD3 <sup>+</sup> CD4 <sup>+</sup> CD45RA <sup>-</sup> CCR7 <sup>-</sup>                                     |
| CD4 Tem Early                      | CD3 <sup>+</sup> CD4 <sup>+</sup> CD45RA <sup>-</sup> CCR7 <sup>-</sup> CD27 <sup>+</sup> CD28 <sup>+</sup> |
| CD4 Tem Late                       | CD3 <sup>+</sup> CD4 <sup>+</sup> CD45RA <sup>-</sup> CCR7 <sup>-</sup> CD27 <sup>-</sup> CD28 <sup>-</sup> |
| Regulatory T cells                 | CD3 <sup>+</sup> CD4 <sup>+</sup> CD25 <sup>BRIGHT</sup>                                                    |
| Treg naive                         | CD3 <sup>+</sup> CD4 <sup>+</sup> CD25 <sup>BRIGHT</sup> CD45RA <sup>+</sup>                                |
| Treg memory                        | CD3 <sup>+</sup> CD4 <sup>+</sup> CD25 <sup>BRIGHT</sup> CD45RA <sup>-</sup>                                |
| CD8 T cells                        | CD45 <sup>+</sup> CD3 <sup>+</sup> CD8 <sup>+</sup>                                                         |
| CD8 Naive                          | CD3 <sup>+</sup> CD8 <sup>+</sup> CD45RA <sup>+</sup> CCR7 <sup>+</sup>                                     |
| CD8 CM                             | CD3 <sup>+</sup> CD8 <sup>+</sup> CD45RA <sup>-</sup> CCR7 <sup>+</sup>                                     |
| CD8 TemRA                          | CD3 <sup>+</sup> CD8 <sup>+</sup> CD45RA <sup>+</sup> CCR7 <sup>-</sup>                                     |
| CD8 TemRA Early                    | CD3 <sup>+</sup> CD8 <sup>+</sup> CD45RA <sup>+</sup> CCR7 <sup>-</sup> CD27 <sup>+</sup> CD28 <sup>+</sup> |
| CD8 TemRA Late                     | CD3 <sup>+</sup> CD8 <sup>+</sup> CD45RA <sup>+</sup> CCR7 <sup>-</sup> CD27 <sup>-</sup> CD28 <sup>-</sup> |
| CD8 Tem                            | CD3 <sup>+</sup> CD8 <sup>+</sup> CD45RA <sup>-</sup> CCR7 <sup>-</sup>                                     |
| CD8 Tem Early                      | CD3 <sup>+</sup> CD8 <sup>+</sup> CD45RA <sup>-</sup> CCR7 <sup>-</sup> CD27 <sup>+</sup> CD28 <sup>+</sup> |
| CD8 Tem Late                       | CD3 <sup>+</sup> CD8 <sup>+</sup> CD45RA <sup>-</sup> CCR7 <sup>-</sup> CD27 <sup>-</sup> CD28 <sup>-</sup> |
| <b>Neutrophils</b>                 |                                                                                                             |
| Neutrophils                        | SSC <sup>BRIGHT</sup> CD45 <sup>DIM</sup>                                                                   |
| Neutrophils, CD16 expr.            | SSC <sup>BRIGHT</sup> CD45 <sup>DIM</sup> ;CD16 <sup>expression</sup>                                       |
| <b>Monocytes</b>                   |                                                                                                             |
| Monocytes                          | SSC <sup>DIM</sup> CD45 <sup>+</sup> CD3 <sup>-</sup> CD19 <sup>-</sup>                                     |
| CD16 <sup>-</sup> monocytes        | SSC <sup>DIM</sup> CD45 <sup>+</sup> CD16 <sup>-</sup>                                                      |
| CD16 <sup>-</sup> mon. CD38 expr.  | SSC <sup>DIM</sup> CD45 <sup>+</sup> CD16 <sup>-</sup> ;CD38 <sup>expression</sup>                          |
| CD16 <sup>-</sup> mon. HLADR expr. | SSC <sup>DIM</sup> CD45 <sup>+</sup> CD16 <sup>-</sup> ;HLADR <sup>expression</sup>                         |
| CD16 <sup>+</sup> monocytes        | SSC <sup>DIM</sup> CD45 <sup>+</sup> CD16 <sup>+</sup>                                                      |
| CD16 <sup>+</sup> mon. CD38 expr.  | SSC <sup>DIM</sup> CD45 <sup>+</sup> CD16 <sup>+</sup> ;CD38 <sup>expression</sup>                          |
| CD16 <sup>+</sup> mon. HLADR expr. | SSC <sup>DIM</sup> CD45 <sup>+</sup> CD16 <sup>+</sup> ;HLADR <sup>expression</sup>                         |
| <b>B cells</b>                     |                                                                                                             |
| B cells                            | CD45 <sup>+</sup> CD19 <sup>+</sup>                                                                         |
| Plasmablasts                       | CD45 <sup>+</sup> CD19 <sup>+</sup> CD38 <sup>BRIGHT</sup> CD27 <sup>BRIGHT</sup>                           |
| Transitional B cells               | CD45 <sup>+</sup> CD19 <sup>+</sup> CD38 <sup>BRIGHT</sup> CD27 <sup>-</sup>                                |
| Naive B cells                      | CD45 <sup>+</sup> CD19 <sup>+</sup> CD38 <sup>DIM</sup> CD27 <sup>-</sup>                                   |
| Memory B cells                     | CD45 <sup>+</sup> CD19 <sup>+</sup> CD38 <sup>DIM</sup> CD27 <sup>+</sup>                                   |
| <b>NK cells</b>                    |                                                                                                             |
| NK cells                           | Either NK CD56 <sup>BRIGHT</sup> or NK CD56 <sup>DIM</sup>                                                  |
| NK CD56 <sup>BRIGHT</sup>          | CD45 <sup>+</sup> CD3 <sup>-</sup> CD19 <sup>-</sup> CD16 <sup>DIM</sup> CD56 <sup>BRIGHT</sup>             |
| NK CD56 <sup>DIM</sup>             | CD45 <sup>+</sup> CD3 <sup>-</sup> CD19 <sup>-</sup> CD16 <sup>BRIGHT</sup> CD56 <sup>DIM</sup>             |

Table S2: Leukocyte numbers per sex and CMV serostatus

|                                                 | Men             |                 |                      | Women           |                 |                      |
|-------------------------------------------------|-----------------|-----------------|----------------------|-----------------|-----------------|----------------------|
|                                                 | CMV- (n=69)     | CMV+ (n=76)     | P value <sup>1</sup> | CMV- (n=53)     | CMV+ (n=91)     | P value <sup>1</sup> |
| <b>T cells</b>                                  |                 |                 |                      |                 |                 |                      |
| T cells                                         | 1002.6 (414.8)  | 1203.5 (481.2)  | <0.001*              | 1124.3 (427.2)  | 1270.8 (433.6)  | 0.026*               |
| T Follicular helper                             | 49.5 (28.3)     | 62 (32.9)       | 0.04*                | 65.9 (35.2)     | 67.4 (40.3)     | 0.374                |
| CD56 <sup>+</sup> T cells                       | 21.8 (30.7)     | 63.3 (111.5)    | <0.001*              | 16.2 (16.6)     | 47.4 (66.6)     | <0.001*              |
| CD4/CD8 ratio                                   | 3.9 (2.7)       | 2.5 (2)         | 0.002*               | 4.2 (3.2)       | 2.8 (1.6)       | <0.001*              |
| CD4 T cells                                     | 683.1 (369.1)   | 769.1 (424.1)   | 0.041*               | 896 (367.6)     | 890 (337.4)     | 0.847                |
| CD4 Naive                                       | 321.9 (267.5)   | 255.6 (216)     | 0.292                | 343.7 (262.5)   | 372.5 (304.6)   | 0.924                |
| CD4 CM                                          | 175.6 (91)      | 217.5 (95.8)    | 0.01*                | 234.1 (130.2)   | 231.3 (146.9)   | 0.179                |
| CD4 TemRA                                       | 27.9 (29.5)     | 48.6 (44.5)     | <0.001*              | 33.9 (51.5)     | 53 (57.1)       | 0.003*               |
| CD4 TemRA Early                                 | 22.6 (27.4)     | 20.2 (21)       | 0.666                | 29.7 (43)       | 27.9 (31.9)     | 0.839                |
| CD4 TemRA Late                                  | 0.1 (0.3)       | 5.8 (26.6)      | <0.001*              | 0.1 (0.2)       | 5.9 (14.2)      | <0.001*              |
| CD4 Tem                                         | 110.6 (70.1)    | 159.1 (116.2)   | <0.001*              | 151.3 (86.2)    | 176.7 (113.2)   | 0.177                |
| CD4 Tem Early                                   | 77.7 (51.4)     | 89.2 (55.8)     | 0.166                | 114.1 (60.4)    | 104 (74.8)      | 0.362                |
| CD4 Tem Late                                    | 1.1 (1.5)       | 15.3 (28)       | <0.001*              | 1.1 (1.6)       | 9 (14.3)        | <0.001*              |
| Regulatory T cells                              | 34.7 (18.8)     | 34.8 (23.6)     | 0.556                | 42.6 (22.4)     | 42.4 (24.2)     | 0.377                |
| Treg naive                                      | 6.8 (4)         | 7.2 (3.2)       | 0.607                | 8.3 (5.9)       | 10.1 (5.7)      | 0.479                |
| Treg memory                                     | 9.3 (5.9)       | 10.2 (5.2)      | 0.343                | 10.5 (5.5)      | 9.1 (6.4)       | 0.049                |
| CD8 T cells                                     | 188.9 (199.8)   | 337.3 (247.2)   | <0.001*              | 199.6 (129.5)   | 330.7 (162.4)   | <0.001*              |
| CD8 Naive                                       | 20.9 (31.9)     | 18 (28.4)       | 0.532                | 36.7 (45.4)     | 36 (43.4)       | 0.948                |
| CD8 CM                                          | 13.7 (11.3)     | 17.6 (15.7)     | 0.01*                | 17.3 (13.3)     | 16.9 (15.7)     | 0.76                 |
| CD8 TemRA                                       | 32.5 (42.2)     | 84.6 (108.9)    | <0.001*              | 27.8 (26.6)     | 74.2 (72)       | <0.001*              |
| CD8 TemRA Early                                 | 6.8 (7.7)       | 7.4 (8.4)       | 0.73                 | 6.2 (7.4)       | 9.2 (10.3)      | 0.129                |
| CD8 TemRA Late                                  | 10.5 (15.5)     | 54.8 (65.1)     | <0.001*              | 8.6 (12.6)      | 39.9 (49.2)     | <0.001*              |
| CD8 Tem                                         | 120.1 (121.6)   | 229.4 (140)     | <0.001*              | 115.8 (62.6)    | 210 (109.4)     | <0.001*              |
| CD8 Tem Early                                   | 64.3 (64.1)     | 73.3 (71)       | 0.409                | 74.4 (52.2)     | 89.5 (65.3)     | 0.538                |
| CD8 Tem Late                                    | 11.4 (14.7)     | 58.9 (71)       | <0.001*              | 6.6 (7.5)       | 47.5 (52.7)     | <0.001*              |
| <b>Neutrophils</b>                              |                 |                 |                      |                 |                 |                      |
| Neutrophils                                     | 2811.5 (2202.7) | 2646 (1236.8)   | 0.197                | 2681 (1451.6)   | 2819.5 (1559.9) | 0.733                |
| Neutrophils, CD16 expr. <sup>2</sup>            | 3671 (5693)     | 4032 (5797)     | 0.393                | 4509 (5447)     | 4389 (5471)     | 0.86                 |
| <b>Monocytes</b>                                |                 |                 |                      |                 |                 |                      |
| Monocytes                                       | 276.8 (133)     | 247.4 (122.4)   | 0.057*               | 233.4 (144)     | 208.6 (120.7)   | 0.365                |
| CD16 <sup>-</sup> monocytes                     | 273.6 (137.1)   | 246.1 (118.1)   | 0.064*               | 229.3 (144.7)   | 206.1 (120.2)   | 0.351                |
| CD16 <sup>-</sup> mon. CD38 expr. <sup>2</sup>  | 1190 (336)      | 1266.5 (339.5)  | 0.039*               | 1168 (190.5)    | 1225 (291.2)    | 0.401                |
| CD16 <sup>-</sup> mon. HLADR expr. <sup>2</sup> | 8953 (6199)     | 8716.5 (4564.2) | 0.78                 | 8834 (3573.5)   | 9085 (6528)     | 0.907                |
| CD16 <sup>+</sup> monocytes                     | 4 (4.7)         | 4 (4.1)         | 0.397                | 4 (3.8)         | 3.4 (3.9)       | 0.628                |
| CD16 <sup>+</sup> mon. CD38 expr. <sup>2</sup>  | 447 (199)       | 483 (197)       | 0.157                | 407 (143.5)     | 449 (219)       | 0.138                |
| CD16 <sup>+</sup> mon. HLADR expr. <sup>2</sup> | 57197 (28277)   | 52852 (41112.2) | 0.587                | 42036 (38598.5) | 40301 (36045.5) | 0.935                |
| <b>B cells</b>                                  |                 |                 |                      |                 |                 |                      |
| B cells                                         | 134.1 (87.2)    | 151.6 (103.7)   | 0.427                | 167.7 (114)     | 171.3 (118.2)   | 0.904                |
| Plasmablasts                                    | 1.4 (1.3)       | 1.4 (1.2)       | 0.677                | 1.5 (1.5)       | 1.4 (1.2)       | 0.644                |
| Transitional B cells                            | 3.5 (3.8)       | 4.1 (5.5)       | 0.643                | 4.5 (5.2)       | 4.2 (4.4)       | 0.806                |
| Naive B cells                                   | 93.6 (71.4)     | 112.5 (74.9)    | 0.487                | 124.8 (89.6)    | 120.1 (79.3)    | 0.826                |
| Memory B cells                                  | 25.1 (24.6)     | 27.7 (29.9)     | 0.73                 | 31.1 (31.4)     | 36.5 (33.6)     | 0.667                |
| <b>NK cells</b>                                 |                 |                 |                      |                 |                 |                      |
| NK cells                                        | 276.2 (216.4)   | 217.3 (194.2)   | 0.109                | 227.5 (115.8)   | 206.5 (140.6)   | 0.39                 |
| NK CD56 <sup>BRIGHT</sup>                       | 11.2 (7.3)      | 10.3 (7.8)      | 0.872                | 11.6 (8.7)      | 9.7 (6.9)       | 0.199                |
| NK CD56 <sup>DIM</sup>                          | 256.5 (216.5)   | 199 (181.7)     | 0.116                | 219.7 (106.4)   | 196.3 (141.4)   | 0.46                 |

Note:

All values are median (interquartile range) cell numbers per  $\mu\text{L}$ , unless otherwise stated

<sup>1</sup> P values of Kruskal-Wallis rank sum test between CMV serostatus per sex, adjusted for age

<sup>2</sup> Values in Median fluorescence intensity

\* Selected outcomes when the False Discovery Rate is set to a maximum of 15%



Table S3: Spearman associations between immune cell subpopulations and frailty in men (n=140)

| Immune cell subset                 | Spearman's rho | P value      | FDR*         |
|------------------------------------|----------------|--------------|--------------|
| <b>Neutrophils</b>                 | <b>0.25</b>    | <b>0.002</b> | <b>0.077</b> |
| Transitional B cells               | -0.19          | 0.015        | 0.324        |
| Monocytes                          | 0.17           | 0.027        | 0.389        |
| CD16 <sup>-</sup> monocytes        | 0.16           | 0.036        | 0.383        |
| CD4 Naive                          | 0.17           | 0.040        | 0.341        |
| CD4 TemRA Late                     | 0.13           | 0.078        | 0.562        |
| CD4 TemRA                          | 0.17           | 0.090        | 0.553        |
| Regulatory T cells                 | 0.12           | 0.104        | 0.561        |
| CD16 <sup>+</sup> monocytes        | 0.16           | 0.133        | 0.634        |
| CD16 <sup>-</sup> mon. HLADR expr. | -0.15          | 0.133        | 0.571        |
| NK CD56 <sup>DIM</sup>             | -0.08          | 0.172        | 0.672        |
| CD4 TemRA Early                    | 0.14           | 0.191        | 0.686        |
| CD4 T cells                        | 0.09           | 0.207        | 0.683        |
| NK cells                           | -0.06          | 0.208        | 0.638        |
| CD4/CD8 ratio                      | 0.10           | 0.219        | 0.628        |
| Memory B cells                     | -0.07          | 0.319        | 0.857        |
| T cells                            | 0.09           | 0.321        | 0.812        |
| CD8 Tem Early                      | -0.07          | 0.354        | 0.844        |
| Treg naive                         | 0.08           | 0.387        | 0.877        |
| Neutrophils, CD16 expr.            | -0.10          | 0.399        | 0.858        |
| T Follicular helper                | 0.07           | 0.439        | 0.898        |
| CD16 <sup>+</sup> mon. CD38 expr.  | -0.05          | 0.440        | 0.860        |
| Lymphocytes                        | 0.04           | 0.574        | 1.073        |
| NK CD56 <sup>BRIGHT</sup>          | -0.03          | 0.582        | 1.042        |
| CD8 Naive                          | 0.05           | 0.590        | 1.014        |
| CD8 CM                             | -0.05          | 0.650        | 1.074        |
| CD8 T cells                        | 0.03           | 0.658        | 1.048        |
| B cells                            | -0.06          | 0.667        | 1.025        |
| CD8 Tem Late                       | 0.09           | 0.689        | 1.022        |
| CD56 <sup>+</sup> T cells          | 0.03           | 0.694        | 0.995        |
| CD8 Tem                            | 0.02           | 0.697        | 0.967        |
| CD16 <sup>-</sup> mon. CD38 expr.  | -0.01          | 0.705        | 0.948        |
| CD16 <sup>+</sup> mon. HLADR expr. | 0.07           | 0.728        | 0.949        |
| CD4 Tem Late                       | 0.03           | 0.735        | 0.930        |
| CD4 CM                             | -0.05          | 0.757        | 0.931        |
| CD4 Tem Early                      | -0.03          | 0.789        | 0.943        |
| CD8 TemRA Late                     | 0.02           | 0.796        | 0.925        |
| Plasmablasts                       | 0.04           | 0.810        | 0.916        |
| Naive B cells                      | -0.05          | 0.839        | 0.925        |
| CD8 TemRA                          | 0.02           | 0.851        | 0.915        |
| CD8 TemRA Early                    | -0.01          | 0.931        | 0.976        |
| Treg memory                        | 0.03           | 0.967        | 0.990        |
| CD4 Tem                            | 0.00           | 0.994        | 0.994        |

*Note:*

The (Spearman) associations are ordered by p value, with the lowest p values shown at the top. Associations that were selected with a FDR lower than 15% are shown in bold.

\* False Discovery Rate (estimated)

Table S4: Spearman associations between immune cell subpopulations and frailty in women (n=137)

| Immune cell subset                 | Spearman's rho | P value          | FDR*         |
|------------------------------------|----------------|------------------|--------------|
| <b>Neutrophils</b>                 | <b>0.40</b>    | <b>&lt;0.001</b> | <b>0.000</b> |
| <b>CD16<sup>-</sup> monocytes</b>  | <b>0.24</b>    | <b>0.003</b>     | <b>0.066</b> |
| <b>Monocytes</b>                   | <b>0.23</b>    | <b>0.004</b>     | <b>0.054</b> |
| <b>CD56<sup>+</sup> T cells</b>    | <b>-0.20</b>   | <b>0.01</b>      | <b>0.109</b> |
| <b>CD4 TemRA Late</b>              | <b>-0.13</b>   | <b>0.015</b>     | <b>0.128</b> |
| CD16 <sup>-</sup> mon. CD38 expr.  | -0.20          | 0.022            | 0.157        |
| CD4 Tem Early                      | 0.20           | 0.032            | 0.194        |
| CD16 <sup>+</sup> mon. CD38 expr.  | -0.18          | 0.037            | 0.200        |
| CD16 <sup>-</sup> mon. HLADR expr. | -0.12          | 0.063            | 0.302        |
| CD4 Tem                            | 0.15           | 0.073            | 0.313        |
| NK CD56 <sup>BRIGHT</sup>          | -0.15          | 0.08             | 0.311        |
| CD8 TemRA                          | -0.09          | 0.091            | 0.325        |
| Transitional B cells               | -0.16          | 0.096            | 0.318        |
| CD8 TemRA Late                     | -0.08          | 0.099            | 0.303        |
| NK CD56 <sup>DIM</sup>             | -0.15          | 0.133            | 0.382        |
| NK cells                           | -0.13          | 0.149            | 0.401        |
| CD8 CM                             | 0.14           | 0.165            | 0.418        |
| CD4 Tem Late                       | -0.04          | 0.235            | 0.562        |
| CD4/CD8 ratio                      | 0.11           | 0.25             | 0.567        |
| CD4 TemRA Early                    | 0.09           | 0.274            | 0.589        |
| CD8 T cells                        | -0.10          | 0.322            | 0.658        |
| CD4 CM                             | 0.07           | 0.34             | 0.665        |
| CD4 Naive                          | -0.11          | 0.344            | 0.643        |
| T Follicular helper                | 0.09           | 0.347            | 0.621        |
| CD8 Naive                          | -0.13          | 0.359            | 0.618        |
| Treg memory                        | 0.07           | 0.374            | 0.618        |
| CD8 TemRA Early                    | -0.02          | 0.422            | 0.672        |
| Memory B cells                     | -0.09          | 0.428            | 0.658        |
| Plasmablasts                       | -0.07          | 0.461            | 0.683        |
| T cells                            | -0.05          | 0.49             | 0.702        |
| CD8 Tem Early                      | 0.12           | 0.519            | 0.720        |
| Lymphocytes                        | -0.02          | 0.526            | 0.707        |
| CD16 <sup>+</sup> monocytes        | 0.07           | 0.551            | 0.718        |
| B cells                            | -0.06          | 0.579            | 0.732        |
| Neutrophils, CD16 expr.            | -0.01          | 0.73             | 0.897        |
| Treg naive                         | -0.04          | 0.779            | 0.930        |
| CD8 Tem                            | 0.02           | 0.814            | 0.946        |
| CD4 TemRA                          | 0.00           | 0.913            | 1.033        |
| CD16 <sup>+</sup> mon. HLADR expr. | 0.01           | 0.946            | 1.044        |
| CD8 Tem Late                       | 0.01           | 0.953            | 1.025        |
| Regulatory T cells                 | 0.01           | 0.966            | 1.013        |
| CD4 T cells                        | 0.01           | 0.967            | 0.990        |
| Naive B cells                      | 0.00           | 0.984            | 0.984        |

*Note:*

The (Spearman) associations are ordered by p value, with the lowest p values shown at the top. Associations that were selected with a FDR lower than 15% are shown in bold.

\* False Discovery Rate (estimated)

Table S5: Repeated sensitivity analysis in men when monocytes were restricted to be HLADR+

| Immune cell subset                                | Spearman's rho | P value      | FDR*         |
|---------------------------------------------------|----------------|--------------|--------------|
| <b>Neutrophils</b>                                | <b>0.25</b>    | <b>0.002</b> | <b>0.061</b> |
| Transitional B cells                              | -0.19          | 0.014        | 0.276        |
| Monocytes (HLADR <sup>+</sup> )                   | 0.17           | 0.027        | 0.349        |
| CD4 Naive                                         | 0.17           | 0.040        | 0.386        |
| CD16 <sup>-</sup> monocytes (HLADR <sup>+</sup> ) | 0.14           | 0.048        | 0.378        |
| CD4 TemRA Late                                    | 0.13           | 0.078        | 0.508        |
| CD4 TemRA                                         | 0.17           | 0.091        | 0.508        |
| Regulatory T cells                                | 0.12           | 0.104        | 0.508        |
| CD16 <sup>+</sup> monocytes (HLADR <sup>+</sup> ) | 0.17           | 0.108        | 0.470        |
| NK CD56 <sup>DIM</sup>                            | -0.08          | 0.172        | 0.671        |
| CD4 TemRA Early                                   | 0.14           | 0.191        | 0.677        |
| CD4 T cells                                       | 0.09           | 0.205        | 0.666        |
| NK cells                                          | -0.06          | 0.209        | 0.626        |
| CD4/CD8 ratio                                     | 0.10           | 0.222        | 0.617        |
| T cells                                           | 0.09           | 0.319        | 0.828        |
| Memory B cells                                    | -0.07          | 0.320        | 0.780        |
| CD8 Tem Early                                     | -0.07          | 0.354        | 0.812        |
| Treg naive                                        | 0.08           | 0.390        | 0.844        |
| Neutrophils, CD16 expr.                           | -0.10          | 0.401        | 0.822        |
| T Follicular helper                               | 0.07           | 0.441        | 0.860        |
| Lymphocytes                                       | 0.04           | 0.574        | 1.066        |
| NK CD56 <sup>BRIGHT</sup>                         | -0.03          | 0.580        | 1.029        |
| CD8 Naive                                         | 0.05           | 0.589        | 0.998        |
| CD8 CM                                            | -0.05          | 0.651        | 1.058        |
| CD8 T cells                                       | 0.03           | 0.657        | 1.026        |
| B cells                                           | -0.06          | 0.669        | 1.003        |
| CD8 Tem Late                                      | 0.09           | 0.688        | 0.994        |
| CD56 <sup>+</sup> T cells                         | 0.03           | 0.695        | 0.968        |
| CD8 Tem                                           | 0.02           | 0.697        | 0.938        |
| CD4 Tem Late                                      | 0.03           | 0.734        | 0.954        |
| CD4 CM                                            | -0.05          | 0.756        | 0.951        |
| CD4 Tem Early                                     | -0.03          | 0.789        | 0.962        |
| CD8 TemRA Late                                    | 0.02           | 0.794        | 0.938        |
| Plasmablasts                                      | 0.04           | 0.807        | 0.926        |
| Naive B cells                                     | -0.05          | 0.838        | 0.934        |
| CD8 TemRA                                         | 0.02           | 0.853        | 0.924        |
| CD8 TemRA Early                                   | -0.01          | 0.929        | 0.980        |
| Treg memory                                       | 0.03           | 0.966        | 0.992        |
| CD4 Tem                                           | 0.00           | 0.994        | 0.994        |

*Note:*

The (Spearman) associations are ordered by p value, with the lowest p values shown at the top. Associations that were selected with a FDR lower than 15% are shown in bold

\* False Discovery Rate (estimated)

Table S6: Repeated sensitivity analysis in women when monocytes were restricted to be HLADR+

| Immune cell subset                                    | Spearman's rho | P value          | FDR*         |
|-------------------------------------------------------|----------------|------------------|--------------|
| <b>Neutrophils</b>                                    | <b>0.40</b>    | <b>&lt;0.001</b> | <b>0.000</b> |
| <b>Monocytes (HLADR<sup>+</sup>)</b>                  | <b>0.23</b>    | <b>0.004</b>     | <b>0.074</b> |
| <b>CD56<sup>+</sup> T cells</b>                       | <b>-0.20</b>   | <b>0.01</b>      | <b>0.124</b> |
| <b>CD16<sup>-</sup> monocytes (HLADR<sup>+</sup>)</b> | <b>0.18</b>    | <b>0.014</b>     | <b>0.139</b> |
| <b>CD4 TemRA Late</b>                                 | <b>-0.13</b>   | <b>0.015</b>     | <b>0.120</b> |
| CD4 Tem Early                                         | 0.20           | 0.032            | 0.208        |
| CD4 Tem                                               | 0.15           | 0.071            | 0.395        |
| NK CD56 <sup>BRIGHT</sup>                             | -0.15          | 0.078            | 0.380        |
| CD8 TemRA                                             | -0.09          | 0.09             | 0.390        |
| Transitional B cells                                  | -0.16          | 0.096            | 0.375        |
| CD8 TemRA Late                                        | -0.08          | 0.099            | 0.350        |
| NK CD56 <sup>DIM</sup>                                | -0.15          | 0.133            | 0.433        |
| NK cells                                              | -0.13          | 0.149            | 0.446        |
| CD8 CM                                                | 0.14           | 0.167            | 0.466        |
| CD4 Tem Late                                          | -0.04          | 0.235            | 0.610        |
| CD4/CD8 ratio                                         | 0.11           | 0.251            | 0.612        |
| CD4 TemRA Early                                       | 0.09           | 0.274            | 0.628        |
| CD8 T cells                                           | -0.10          | 0.324            | 0.701        |
| CD4 CM                                                | 0.07           | 0.34             | 0.697        |
| T Follicular helper                                   | 0.09           | 0.345            | 0.674        |
| CD4 Naive                                             | -0.11          | 0.346            | 0.642        |
| CD8 Naive                                             | -0.13          | 0.359            | 0.637        |
| Treg memory                                           | 0.07           | 0.375            | 0.636        |
| CD8 TemRA Early                                       | -0.02          | 0.423            | 0.688        |
| Memory B cells                                        | -0.09          | 0.428            | 0.668        |
| CD16 <sup>+</sup> monocytes (HLADR <sup>+</sup> )     | 0.09           | 0.441            | 0.661        |
| Plasmablasts                                          | -0.07          | 0.458            | 0.662        |
| T cells                                               | -0.05          | 0.49             | 0.683        |
| CD8 Tem Early                                         | 0.12           | 0.521            | 0.701        |
| Lymphocytes                                           | -0.02          | 0.528            | 0.686        |
| B cells                                               | -0.06          | 0.578            | 0.727        |
| Neutrophils, CD16 expr.                               | -0.01          | 0.729            | 0.888        |
| Treg naive                                            | -0.04          | 0.78             | 0.921        |
| CD8 Tem                                               | 0.02           | 0.814            | 0.934        |
| CD4 TemRA                                             | 0.00           | 0.914            | 1.018        |
| CD8 Tem Late                                          | 0.01           | 0.953            | 1.032        |
| Regulatory T cells                                    | 0.01           | 0.965            | 1.017        |
| CD4 T cells                                           | 0.01           | 0.967            | 0.992        |
| Naive B cells                                         | 0.00           | 0.985            | 0.985        |

*Note:*

The (Spearman) associations are ordered by p value, with the lowest p values shown at the top. Associations that were selected with a FDR lower than 15% are shown in bold

\* False Discovery Rate (estimated)

Table S7: Additional analysis in men (n=140) to test associations with frailty when percentages of subpopulations are used instead of absolute numbers

| Immune cell subset               | Spearman's rho | P value | FDR*  |
|----------------------------------|----------------|---------|-------|
| Transitional B cells, (%)        | -0.22          | 0.011   | 0.373 |
| CD4 Naive, (%)                   | 0.22           | 0.018   | 0.302 |
| CD4 CM, (%)                      | -0.24          | 0.023   | 0.260 |
| T cells, (%)                     | 0.16           | 0.047   | 0.395 |
| NK cells, (%)                    | -0.11          | 0.091   | 0.621 |
| CD4 TemRA Late, (%)              | 0.11           | 0.169   | 0.958 |
| B cells, (%)                     | -0.14          | 0.181   | 0.880 |
| NK CD56 <sup>BRIGHT</sup> , (%)  | 0.10           | 0.185   | 0.787 |
| CD4 Tem, (%)                     | -0.10          | 0.186   | 0.702 |
| CD4 Tem Early, (%)               | -0.11          | 0.204   | 0.695 |
| CD8 T cells, (%)                 | -0.11          | 0.209   | 0.644 |
| CD4 T cells, (%)                 | 0.12           | 0.213   | 0.603 |
| Treg memory, (%)                 | -0.09          | 0.215   | 0.562 |
| NK CD56 <sup>DIM</sup> , (%)     | -0.08          | 0.247   | 0.600 |
| CD4 TemRA, (%)                   | 0.10           | 0.260   | 0.589 |
| CD8 Naive, (%)                   | 0.08           | 0.342   | 0.727 |
| Regulatory T cells, (%)          | 0.05           | 0.425   | 0.849 |
| CD8 CM, (%)                      | -0.03          | 0.464   | 0.877 |
| CD8 Tem Early, (%)               | -0.07          | 0.469   | 0.840 |
| CD8 Tem Late, (%)                | 0.11           | 0.474   | 0.806 |
| CD4 TemRA Early, (%)             | 0.06           | 0.573   | 0.927 |
| Plasmablasts, (%)                | 0.04           | 0.582   | 0.900 |
| Memory B cells, (%)              | -0.01          | 0.670   | 0.990 |
| CD8 TemRA, (%)                   | 0.03           | 0.676   | 0.958 |
| Naive B cells, (%)               | 0.01           | 0.705   | 0.958 |
| CD8 TemRA Late, (%)              | 0.00           | 0.719   | 0.940 |
| CD8 TemRA Early, (%)             | 0.00           | 0.769   | 0.969 |
| T Follicular helper, (%)         | -0.03          | 0.793   | 0.963 |
| CD16 <sup>-</sup> monocytes, (%) | 0.01           | 0.838   | 0.983 |
| CD4 Tem Late, (%)                | -0.05          | 0.848   | 0.961 |
| CD8 Tem, (%)                     | 0.08           | 0.865   | 0.948 |
| CD16 <sup>+</sup> monocytes, (%) | -0.01          | 0.890   | 0.945 |
| Treg naive, (%)                  | -0.02          | 0.934   | 0.962 |
| CD56 <sup>+</sup> T cells, (%)   | -0.03          | 0.992   | 0.992 |

*Note:*

The (Spearman) associations are ordered by p value, with the lowest p values shown at the top. Associations that were selected with a FDR lower than 15% are shown in bold

\* False Discovery Rate (estimated)

Table S8: Additional analysis in women (n=137) to test associations with frailty when percentages of sub-populations are used instead of absolute numbers

| Immune cell subset               | Spearman's rho | P value | FDR*  |
|----------------------------------|----------------|---------|-------|
| CD56 <sup>+</sup> T cells, (%)   | -0.18          | 0.009   | 0.304 |
| CD4 TemRA Late, (%)              | -0.17          | 0.009   | 0.156 |
| CD8 Tem, (%)                     | 0.20           | 0.021   | 0.236 |
| Transitional B cells, (%)        | -0.21          | 0.022   | 0.188 |
| CD4 Tem Early, (%)               | 0.17           | 0.029   | 0.195 |
| CD8 Tem Early, (%)               | 0.18           | 0.056   | 0.319 |
| CD8 CM, (%)                      | 0.14           | 0.062   | 0.301 |
| CD8 TemRA Late, (%)              | -0.09          | 0.065   | 0.275 |
| CD4 Tem, (%)                     | 0.16           | 0.066   | 0.251 |
| CD8 TemRA, (%)                   | -0.09          | 0.075   | 0.256 |
| Naive B cells, (%)               | 0.13           | 0.086   | 0.264 |
| NK cells, (%)                    | -0.17          | 0.093   | 0.264 |
| CD4 Naive, (%)                   | -0.12          | 0.133   | 0.347 |
| CD4 CM, (%)                      | 0.14           | 0.138   | 0.336 |
| CD4 T cells, (%)                 | 0.10           | 0.205   | 0.465 |
| Treg memory, (%)                 | 0.07           | 0.229   | 0.486 |
| CD4 Tem Late, (%)                | -0.05          | 0.232   | 0.465 |
| CD4 TemRA Early, (%)             | 0.10           | 0.258   | 0.487 |
| T cells, (%)                     | 0.16           | 0.293   | 0.524 |
| CD8 T cells, (%)                 | -0.09          | 0.294   | 0.499 |
| Memory B cells, (%)              | -0.08          | 0.334   | 0.540 |
| T Follicular helper, (%)         | 0.10           | 0.350   | 0.540 |
| CD16 <sup>+</sup> monocytes, (%) | -0.02          | 0.458   | 0.677 |
| Treg naive, (%)                  | -0.05          | 0.460   | 0.651 |
| CD8 Tem Late, (%)                | 0.09           | 0.480   | 0.653 |
| CD16 <sup>-</sup> monocytes, (%) | 0.07           | 0.547   | 0.716 |
| B cells, (%)                     | -0.06          | 0.572   | 0.720 |
| CD8 Naive, (%)                   | -0.10          | 0.662   | 0.804 |
| Plasmablasts, (%)                | -0.04          | 0.694   | 0.814 |
| Regulatory T cells, (%)          | -0.04          | 0.726   | 0.823 |
| CD8 TemRA Early, (%)             | -0.04          | 0.728   | 0.798 |
| NK CD56 <sup>DIM</sup> , (%)     | 0.02           | 0.825   | 0.877 |
| NK CD56 <sup>BRIGHT</sup> , (%)  | -0.02          | 0.825   | 0.850 |
| CD4 TemRA, (%)                   | 0.00           | 0.893   | 0.893 |

*Note:*

The (Spearman) associations are ordered by p value, with the lowest p values shown at the top. Associations that were selected with a FDR lower than 15% are shown in bold

\* False Discovery Rate (estimated)
